# Supplementary material
Source: MDPI journal article supplement (https://www.mdpi.com/2071-1050/10/12/4716)
Supplement: s1 [file s1]

Supplementary material: Descriptive tables from Rooting the future: on-farm trees contribution to household energy security and asset creation as a resilient development pathway —evidence from a 20-year panel in rural Ethiopia.

Nathan Morrow—corresponding author

Associate Research Professor, Tulane University

[nmorrow@tulane.edu](mailto:nmorrow@tulane.edu), +1 646 858 6413, 1440 Canal street, New Orleans LA USA

Co-authors Luca Salvati, Andrea Colantoni and Nancy B. Mock

List of tables:

- Table 1: Different tree types and household frequencies from ERHS 1994
- Table 2: Other variables considered in stepwise regression
- Table 3: Dwelling Value G2SLS Results
- Table 4: Tropical Livestock Unit G2SLS Results

**Table 1.** Different tree types and household frequencies from ERHS 1994.

| Tree type           | Number of households |
|---------------------|----------------------|
| EUCALYPTUS          | 595                  |
| ENSET               | 395                  |
| GESHO               | 108                  |
| SHIEFERA/HALEKO     | 23                   |
| AVOCADO             | 115                  |
| FRUIT               | 8                    |
| MANGO               | 30                   |
| HAMICHO             | 1                    |
| ORANGE              | 32                   |
| Tid (Junipers)      | 10                   |
| Olive Tree (Woyera) | 6                    |
| Shembeko            | 1                    |
| Belase              | 37                   |
| Yemeno zafi         | 2                    |
| Wanza               | 3                    |
| Papaya              | 13                   |
| Kitekelo            | 2                    |
| Bisana              | 2                    |
| Kasmir              | 3                    |
| Zeytuna             | 2                    |
| Git                 | 1                    |
| Lomi                | 1                    |
| Teha bula           | 1                    |
| Medilo              | 1                    |
| Kundo Berber        | 1                    |
| Shew shewe          | 1                    |
| Kerese              | 1                    |
| Ankelba             | 1                    |
| Girar               | 1                    |
| Marshalo            | 1                    |
| Coniferous tree     | 3                    |

**Table 2.** other variables considered in reverse stepwise regression.

| Variables eliminated in reverse stepwise procedure, had quality issues or not available in all rounds |                                   |
|-------------------------------------------------------------------------------------------------------|-----------------------------------|
| Time constant                                                                                         | Education of Head of Household    |
|                                                                                                       | Average education of household    |
|                                                                                                       | Access to water source            |
|                                                                                                       | Latitude                          |
|                                                                                                       | Longitude                         |
|                                                                                                       | Elevation                         |
| Time varying                                                                                          | Land owned                        |
|                                                                                                       | Sales of timber and firewood      |
|                                                                                                       | Per capita income and consumption |
|                                                                                                       | Food ratio                        |
|                                                                                                       | Diet diversity                    |
|                                                                                                       | Transfers                         |
|                                                                                                       | Asset index                       |
|                                                                                                       | # Shocks                          |

**Table 3.** Dwelling Value G2SLS Results.

|                                                                              |                                             |                          |                                 |
|------------------------------------------------------------------------------|---------------------------------------------|--------------------------|---------------------------------|
| G2SLS random-effects IV regression                                           |                                             | Number of obs = 5,900    |                                 |
| Group variable: hhid3                                                        |                                             | Number of groups = 1,475 |                                 |
| R-sq:                                                                        | Obs per group:                              |                          |                                 |
| within = 0.0176                                                              | min =                                       | 4                        |                                 |
| between = 0.4121                                                             | avg =                                       | 4.0                      |                                 |
| overall = 0.3422                                                             | max =                                       | 4                        |                                 |
| Wald chi2(7) = 1730.66                                                       |                                             |                          |                                 |
| corr(u_i, X) = 0 (assumed)                                                   | Prob > chi2 =                               | 0.0000                   |                                 |
| -----                                                                        |                                             |                          |                                 |
| zltcst_                                                                      | Coef.                                       | Std. Err.                | z P> z  [95% Conf. Interval]    |
| -----+-----                                                                  |                                             |                          |                                 |
| zleuc_                                                                       | .2522862                                    | .0479892                 | 5.26 0.000 .1582292 .3463432    |
| zlens_                                                                       | -.0193004                                   | .017774                  | -1.09 0.278 -.0541368 .015536   |
| zlcrr_                                                                       | .0337839                                    | .0099352                 | 3.40 0.001 .0143113 .0532566    |
| zlhhs_                                                                       | .0909594                                    | .012646                  | 7.19 0.000 .0661737 .1157451    |
| zlnumrm_04                                                                   | .115648                                     | .0154325                 | 7.49 0.000 .0854008 .1458951    |
| meanzltcst_4                                                                 | .7047835                                    | .0345667                 | 20.39 0.000 .637034 .7725329    |
| femalehh                                                                     | -.093969                                    | .03743                   | -2.51 0.012 -.1673305 -.0206075 |
| _cons                                                                        | .0208962                                    | .0172174                 | 1.21 0.225 -.0128494 .0546417   |
| -----+-----                                                                  |                                             |                          |                                 |
| sigma_u                                                                      | .61861665                                   |                          |                                 |
| sigma_e                                                                      | .59937668                                   |                          |                                 |
| rho                                                                          | .51579251 (fraction of variance due to u_i) |                          |                                 |
| -----                                                                        |                                             |                          |                                 |
| Instrumented: zleuc_ zlens_                                                  |                                             |                          |                                 |
| Instruments: zlcrr_ zlhhs_ zlnumrm_04 meanzltcst_4 femalehh lagpeuc2 zlpens_ |                                             |                          |                                 |
| -----                                                                        |                                             |                          |                                 |
| First-stage G2SLS regression                                                 |                                             |                          |                                 |
| Number of obs =                                                              |                                             | 5,900                    |                                 |
| Wald chi(7) =                                                                |                                             | 1167                     |                                 |

|                              |           |           |        |       |                      |           |
|------------------------------|-----------|-----------|--------|-------|----------------------|-----------|
| Prob > chi2 = 0.0000         |           |           |        |       |                      |           |
| -----                        |           |           |        |       |                      |           |
| zleuc_                       | Coef.     | Std. Err. | z      | P> z  | [95% Conf. Interval] |           |
| -----+-----                  |           |           |        |       |                      |           |
| zlcrcr_                      | .0689592  | .0113167  | 6.09   | 0.000 | .0467789             | .0911394  |
| zlhhs_                       | .1418638  | .0126504  | 11.21  | 0.000 | .1170694             | .1666582  |
| zlnumrm_04                   | .0189664  | .0187466  | 1.01   | 0.312 | -.0177763            | .0557091  |
| meanzltcst_4                 | .4196235  | .0303036  | 13.85  | 0.000 | .3602295             | .4790175  |
| femalehh                     | -.0932054 | .0453123  | -2.06  | 0.040 | -.1820159            | -.004395  |
| lagpeuc2                     | .1931433  | .011169   | 17.29  | 0.000 | .1712526             | .2150341  |
| zlpens_                      | .1392048  | .0144838  | 9.61   | 0.000 | .1108171             | .1675925  |
| _cons                        | .0207264  | .0209982  | 0.99   | 0.324 | -.0204293            | .061882   |
| -----                        |           |           |        |       |                      |           |
| First-stage G2SLS regression |           |           |        |       |                      |           |
| Number of obs = 5,900        |           |           |        |       |                      |           |
| Wald chi(7) = 19505          |           |           |        |       |                      |           |
| Prob > chi2 = 0.0000         |           |           |        |       |                      |           |
| -----                        |           |           |        |       |                      |           |
| zlens_                       | Coef.     | Std. Err. | z      | P> z  | [95% Conf. Interval] |           |
| -----+-----                  |           |           |        |       |                      |           |
| zlcrcr_                      | -.0135661 | .0048177  | -2.82  | 0.005 | -.0230086            | -.0041235 |
| zlhhs_                       | .0428629  | .0053855  | 7.96   | 0.000 | .0323074             | .0534183  |
| zlnumrm_04                   | .0368087  | .0079808  | 4.61   | 0.000 | .0211666             | .0524509  |
| meanzltcst_4                 | -.0334211 | .0129009  | -2.59  | 0.010 | -.0587063            | -.0081359 |
| femalehh                     | -.0578274 | .0192904  | -3.00  | 0.003 | -.0956358            | -.020019  |
| lagpeuc2                     | .0133496  | .0047549  | 2.81   | 0.005 | .0040303             | .022669   |
| zlpens_                      | .8010436  | .006166   | 129.91 | 0.000 | .7889584             | .8131288  |
| _cons                        | .0128593  | .0089393  | 1.44   | 0.150 | -.0046615            | .0303801  |
| -----                        |           |           |        |       |                      |           |
| -----                        |           |           |        |       |                      |           |
| -----                        |           |           |        |       |                      |           |

**Table 4.** Tropical Livestock Unit G2SLS Results.

|                                    |                          |
|------------------------------------|--------------------------|
| G2SLS random-effects IV regression | Number of obs = 5,900    |
| Group variable: hhid3              | Number of groups = 1,475 |

|                  |                |
|------------------|----------------|
| R-sq:            | Obs per group: |
| within = 0.0899  | min = 4        |
| between = 0.4895 | avg = 4.0      |
| overall = 0.3102 | max = 4        |

|                                                      |
|------------------------------------------------------|
| Wald chi2(4) = 2129.50                               |
| corr(u_i, X) = 0 (assumed)      Prob > chi2 = 0.0000 |

|        |       |           |   |      |                      |
|--------|-------|-----------|---|------|----------------------|
| zltsu_ | Coef. | Std. Err. | z | P> z | [95% Conf. Interval] |
|--------|-------|-----------|---|------|----------------------|

|                                          |                                     |          |       |       |           |          |
|------------------------------------------|-------------------------------------|----------|-------|-------|-----------|----------|
| zlc_r                                    | 1.030726                            | .0482784 | 21.35 | 0.000 | .936102   | 1.12535  |
| zlens_                                   | .2443161                            | .0749232 | 3.26  | 0.001 | .0974694  | .3911629 |
| femalehh                                 | -.6950671                           | .387963  | -1.79 | 0.073 | -1.455461 | .0653265 |
| crfodd2                                  | .1152699                            | .0308991 | 3.73  | 0.000 | .0547088  | .1758311 |
| _cons                                    | .1026731                            | .0912908 | 1.12  | 0.261 | -.0762537 | .2815998 |
| -----+-----                              |                                     |          |       |       |           |          |
| sigma_u                                  | 0                                   |          |       |       |           |          |
| sigma_e                                  | 1.2762394                           |          |       |       |           |          |
| rho                                      | 0 (fraction of variance due to u_i) |          |       |       |           |          |
| -----+-----                              |                                     |          |       |       |           |          |
| Instrumented: zlc_r zlens_ femalehh      |                                     |          |       |       |           |          |
| Instruments: crfodd2 zlhhs_ zleuc_ zllon |                                     |          |       |       |           |          |

---

First-stage G2SLS regression

Number of obs = 5,900  
Wald chi(4) = 1891  
Prob > chi2 = 0.0000

| zlc_r_      | Coef.     | Std. Err. | z     | P> z  | [95% Conf. Interval] |           |
|-------------|-----------|-----------|-------|-------|----------------------|-----------|
| -----+----- |           |           |       |       |                      |           |
| crfodd2     | .1937841  | .0237908  | 8.15  | 0.000 | .147155              | .2404132  |
| zlhhs_      | .3437099  | .0119542  | 28.75 | 0.000 | .3202801             | .3671397  |
| zleuc_      | .1437475  | .0122396  | 11.74 | 0.000 | .1197583             | .1677367  |
| zllon       | .237782   | .0117827  | 20.18 | 0.000 | .2146884             | .2608756  |
| _cons       | -.0872357 | .0155898  | -5.60 | 0.000 | -.1177912            | -.0566802 |
| -----+----- |           |           |       |       |                      |           |

---

First-stage G2SLS regression

Number of obs = 5,900  
Wald chi(4) = 2408  
Prob > chi2 = 0.0000

| zlens_      | Coef.     | Std. Err. | z      | P> z  | [95% Conf. Interval] |           |
|-------------|-----------|-----------|--------|-------|----------------------|-----------|
| -----+----- |           |           |        |       |                      |           |
| crfodd2     | -.1767371 | .0230386  | -7.67  | 0.000 | -.2218919            | -.1315822 |
| zlhhs_      | .2208908  | .0115763  | 19.08  | 0.000 | .1982017             | .2435799  |
| zleuc_      | .1329748  | .0118526  | 11.22  | 0.000 | .1097441             | .1562056  |
| zllon       | -.4133376 | .0114102  | -36.23 | 0.000 | -.4357011            | -.3909741 |
| _cons       | .0795617  | .0150969  | 5.27   | 0.000 | .0499722             | .1091511  |

---

First-stage G2SLS regression

Number of obs = 5,900  
Wald chi(4) = 492  
Prob > chi2 = 0.0000

---

|          | Coef.     | Std. Err. | z      | P> z  | [95% Conf. Interval] |
|----------|-----------|-----------|--------|-------|----------------------|
| femalehh |           |           |        |       |                      |
| crfodd2  | -.0129936 | .0109272  | -1.19  | 0.234 | -.0344106 .0084233   |
| zlhhs_   | -.0956177 | .0054906  | -17.41 | 0.000 | -.1063791 -.0848562  |
| zleuc_   | -.0042151 | .0056217  | -0.75  | 0.453 | -.0152335 .0068032   |
| zllon    | .0593343  | .0054118  | 10.96  | 0.000 | .0487273 .0699413    |
| _cons    | .2282222  | .0071605  | 31.87  | 0.000 | .2141879 .2422565    |
